# Supplementary material
Source: Springer Nature journal article supplement (https://www.springermedizin.de/resource/supplementary/12877_2013_974_MOESM1_ESM.pdf/9440838)
Supplement: MOESM1 [file 9440838]

**PLEASE TICK ONE BOX PER LINE  
WHICH SHOWS HOW YOU FEEL  
ABOUT EACH STATEMENT**

**STRONGLY  
DISAGREE**

**DISAGREE**

**NEITHER  
AGREE NOR  
DISAGREE**

**AGREE**

**STRONGLY  
AGREE**

|           |                                                                                     |                          |                          |                          |                          |                          |
|-----------|-------------------------------------------------------------------------------------|--------------------------|--------------------------|--------------------------|--------------------------|--------------------------|
| <b>1</b>  | I always classify myself as old                                                     | <input type="checkbox"/> | <input type="checkbox"/> | <input type="checkbox"/> | <input type="checkbox"/> | <input type="checkbox"/> |
| <b>2</b>  | I am always aware of the fact that I am getting older                               | <input type="checkbox"/> | <input type="checkbox"/> | <input type="checkbox"/> | <input type="checkbox"/> | <input type="checkbox"/> |
| <b>3</b>  | I feel my age in everything that I do                                               | <input type="checkbox"/> | <input type="checkbox"/> | <input type="checkbox"/> | <input type="checkbox"/> | <input type="checkbox"/> |
| <b>4</b>  | As I get older I get wiser                                                          | <input type="checkbox"/> | <input type="checkbox"/> | <input type="checkbox"/> | <input type="checkbox"/> | <input type="checkbox"/> |
| <b>5</b>  | As I get older I continue to grow as a person                                       | <input type="checkbox"/> | <input type="checkbox"/> | <input type="checkbox"/> | <input type="checkbox"/> | <input type="checkbox"/> |
| <b>6</b>  | As I get older I appreciate things more                                             | <input type="checkbox"/> | <input type="checkbox"/> | <input type="checkbox"/> | <input type="checkbox"/> | <input type="checkbox"/> |
| <b>7</b>  | I get depressed when I think about how ageing might affect the things that I can do | <input type="checkbox"/> | <input type="checkbox"/> | <input type="checkbox"/> | <input type="checkbox"/> | <input type="checkbox"/> |
| <b>8</b>  | The quality of my social life in later years depends on me                          | <input type="checkbox"/> | <input type="checkbox"/> | <input type="checkbox"/> | <input type="checkbox"/> | <input type="checkbox"/> |
| <b>9</b>  | The quality of my relationships with others in later life depends on me             | <input type="checkbox"/> | <input type="checkbox"/> | <input type="checkbox"/> | <input type="checkbox"/> | <input type="checkbox"/> |
| <b>10</b> | Whether I continue living life to the full depends on me                            | <input type="checkbox"/> | <input type="checkbox"/> | <input type="checkbox"/> | <input type="checkbox"/> | <input type="checkbox"/> |
| <b>11</b> | Getting older makes me less independent                                             | <input type="checkbox"/> | <input type="checkbox"/> | <input type="checkbox"/> | <input type="checkbox"/> | <input type="checkbox"/> |
| <b>12</b> | As I get older I can take part in fewer activities                                  | <input type="checkbox"/> | <input type="checkbox"/> | <input type="checkbox"/> | <input type="checkbox"/> | <input type="checkbox"/> |
| <b>13</b> | As I get older I do not cope as well with problems that arise                       | <input type="checkbox"/> | <input type="checkbox"/> | <input type="checkbox"/> | <input type="checkbox"/> | <input type="checkbox"/> |
| <b>14</b> | Slowing down with age is not something I can control                                | <input type="checkbox"/> | <input type="checkbox"/> | <input type="checkbox"/> | <input type="checkbox"/> | <input type="checkbox"/> |
| <b>15</b> | I have no control over the effects which getting older has on my social life        | <input type="checkbox"/> | <input type="checkbox"/> | <input type="checkbox"/> | <input type="checkbox"/> | <input type="checkbox"/> |

**PLEASE TICK ONE BOX PER LINE  
WHICH SHOWS HOW YOU FEEL  
ABOUT EACH STATEMENT**

**STRONGLY  
AGREE**

**DISAGREE**

**NEITHER  
AGREE NOR  
DISAGREE**

**AGREE**

**STRONGLY  
AGREE**

**16** I worry about the effects that getting older may have on my relationships with others

**17** I feel angry when I think about getting older

**Sub-dimensions for Scoring:**

Timeline-Chronic: Items 1, 2 and 3

Consequences-Positive: Items 4, 5 and 6

Emotional Representations: Items 7, 16 and 17

Consequences and Control Negative: Items 11, 12, 13, 14 and 15

Control-Positive: Items 8, 9 and 10
